# Supplementary material for: A combined bioinformatics and LC-MS-based approach for the development and benchmarking of a comprehensive database of Lymnaea CNS proteins
Source: Oxford University Press journal article supplement (doi:10.1242/jeb.243753), 2022-04-01
Supplement: jeb243753supp.pdf [file jeb243753supp.pdf]

**Table S1. Details of the distributions of the KOG (EuKaryotic Orthologous Groups) annotations of the protein sequences in the LymcCNS-PDB shown in Figure 4.** Proteins were annotated and grouped into 25 functional categories (A-Z) using the RPSBLAST 2.2.15 program on NCBI KOG 2/2/2011 database using an e-value <1E-5 cutoff for prediction (<http://weizhong-lab.ucsd.edu/webMGA/server/kog>).

| #Class | No_families | Coverage | Abundance | Sum      | %      | Description                                                   |
|--------|-------------|----------|-----------|----------|--------|---------------------------------------------------------------|
| A      | 25          | 1        | 0.008411  | 1.295565 | 0.649  | RNA processing and modification                               |
| B      | 19          | 1        | 0.012752  | 1.295565 | 0.984  | Chromatin structure and dynamics                              |
| C      | 258         | 0.341085 | 0.046007  | 1.295565 | 3.551  | Energy production and conversion                              |
| D      | 72          | 0.555555 | 0.060892  | 1.295565 | 4.700  | Cell cycle control, cell division, chromosome partitioning    |
| E      | 270         | 0.407407 | 0.063512  | 1.295565 | 4.902  | Amino acid transport and metabolism                           |
| F      | 95          | 0.621052 | 0.025505  | 1.295565 | 1.969  | Nucleotide transport and metabolism                           |
| G      | 230         | 0.347826 | 0.042989  | 1.295565 | 3.318  | Carbohydrate transport and metabolism                         |
| H      | 179         | 0.312849 | 0.020367  | 1.295565 | 1.572  | Coenzyme transport and metabolism                             |
| I      | 94          | 0.606382 | 0.044557  | 1.295565 | 3.439  | Lipid transport and metabolism                                |
| J      | 245         | 0.783673 | 0.068816  | 1.295565 | 5.312  | Translation, ribosomal structure and biogenesis               |
| K      | 231         | 0.38961  | 0.092849  | 1.295565 | 7.167  | Transcription                                                 |
| L      | 238         | 0.411764 | 0.09508   | 1.295565 | 7.339  | Replication, recombination and repair                         |
| M      | 188         | 0.24468  | 0.020782  | 1.295565 | 1.604  | Cell wall/membrane/envelope biogenesis                        |
| N      | 96          | 0.072916 | 0.002937  | 1.295565 | 0.227  | Cell motility                                                 |
| O      | 203         | 0.546798 | 0.087016  | 1.295565 | 6.716  | Posttranslational modification, protein turnover, chaperones  |
| P      | 212         | 0.240566 | 0.029134  | 1.295565 | 2.249  | Inorganic ion transport and metabolism                        |
| Q      | 88          | 0.340909 | 0.031203  | 1.295565 | 2.408  | Secondary metabolites biosynthesis, transport and catabolism  |
| R      | 702         | 0.307692 | 0.32041   | 1.295565 | 24.731 | General function prediction only                              |
| S      | 1347        | 0.111358 | 0.0435    | 1.295565 | 3.358  | Function unknown                                              |
| T      | 152         | 0.282894 | 0.107492  | 1.295565 | 8.297  | Signal transduction mechanisms                                |
| U      | 158         | 0.335443 | 0.023904  | 1.295565 | 1.845  | Intracellular trafficking, secretion, and vesicular transport |
| V      | 46          | 0.195652 | 0.012166  | 1.295565 | 0.939  | Defense mechanisms                                            |
| W      | 1           | 1        | 6.80E-05  | 1.295565 | 0.005  | Extracellular structures                                      |
| Y      | 2           | 1        | 0.000608  | 1.295565 | 0.047  | Nuclear structure                                             |
| Z      | 12          | 1        | 0.034608  | 1.295565 | 2.671  | Cytoskeleton                                                  |
